# Supplementary material for: The Effects of Longitudinal White Matter Hyperintensity Change on Cognitive Decline and Cortical Thinning over Three Years
Source: PubMed Central journal article supplement (PMC7465642; doi:10.3390/jcm9082663), 2020-08-17
Supplement: jcm-09-02663-s001.pdf [file jcm-09-02663-s001.pdf]

**Table S1. Correlation between delta WMH and longitudinal change of cortical thickness.**

|                  | <i>B value</i> | <i>SE</i> | <i>p-value</i> |
|------------------|----------------|-----------|----------------|
| Global thickness | -0.000014      | 0.000014  | 0.317          |
| Frontal lobe     | -0.000001      | 0.000016  | 0.141          |
| Temporal lobe    | -0.000001      | 0.000001  | 0.119          |
| Parietal lobe    | -0.000003      | 0.000014  | 0.842          |
| Occipital lobe   | -0.000010      | 0.000013  | 0.432          |
